# Supplementary material for: Highly sulfur-tolerant Pd composite membranes with a protective layer of MoS2/γ-alumina
Source: Royal Society of Chemistry journal article supplement (doi:10.1039/c7ta01542a), 2017-01-01
Supplement: c7ta01542a1.pdf [file c7ta01542a1.pdf]

## Electronic (ESI) for Journal of Materials Chemistry A

### Highly sulfur-tolerant Pd composite membranes with a protective layer of MoS<sub>2</sub>/γ-alumina

Bingbing Chen<sup>a</sup>, Tianying Xu<sup>a</sup>, Hui Li<sup>a\*</sup>, Feng Bao<sup>a</sup>, Jiafeng Yu<sup>a</sup>, Xinzhong Li<sup>b\*</sup>, Hengyong Xu<sup>a</sup>

<sup>a</sup> Dalian National Laboratory for Clean Energy, Dalian Institute of Chemical Physics, Chinese Academy of Sciences, Dalian 116023, P. R. China

<sup>b</sup> School of Materials Science and Engineering, Harbin Institute of Technology, Harbin 150001, P. R. China

#### Experimental Methods

##### Preparation of the Pd composite membranes

Pd membranes were deposited on the outside surface of porous ceramic tubes (o.d. = 12.5 mm, i.d. = 8 mm, length of Pd layer = 50 mm) by a modified electroless plating method, which has been described previously (*J. Membr. Sci.*, 2007, 299, 130). Three Pd composite membranes were prepared for the experiments in this work, i.e., Pd-1, Pd-2 and Pd-3. The latter two tubes (Pd-2 and Pd-3) were coated with MoS<sub>2</sub>/γ-alumina protective layer, as described in Table 1. Following the composite membranes were sealed at both ends with graphite O-rings.

##### Gas-permeation measurements

A shell-and-tube apparatus, as described in our previous work (*J. Membr. Sci.*, 2007, 299, 130), was used to measure the permeation of H<sub>2</sub> with different concentrations of H<sub>2</sub>S, i.e., 10 ppm H<sub>2</sub>S/H<sub>2</sub> and 20 ppm H<sub>2</sub>S/H<sub>2</sub>. Pure H<sub>2</sub> and N<sub>2</sub> permeation across the composite membranes were also analyzed to check the performance of Pd composite membranes. All gases were introduced into the membrane tube from the outer stainless-steel reactor through mass flow controllers (MFC). The hydrogen permeation was investigated at 673 K, and the retentate pressure was set at 1 bar gauge pressure with a pressure controller while the permeate side was always kept at atmospheric pressure without using any sweep gas. The permeation rate was monitored by bubble flow

meters while the composition of the permeate gas was analyzed by an on-line gas chromatograph (Shimadzu GC-14C) equipped with a hayesep D column and a FPD detector.

## **Characterization**

### **SEM/EDS**

The morphologies of membrane samples were characterized by scanning electron microscopy on a high resolution scanning electron microscope (JSM-7800F), following the exposure to H<sub>2</sub>S containing atmosphere.
